# Supplementary material for: An open-source atlas and evidence-based appraisal framework of psychiatric brain stimulation targets generated by causal network mapping
Source: Research Square preprint supplement (doi:10.21203/rs.3.rs-6070697/v1), 2025-03-26
Supplement: Supplementary file 1 [file a6e201d7da509224cffb2856.docx]

**Supplementary Information**

I.Symptom-network evaluations

*Anxiety*

Bias: The anxiety network target was not downgraded for bias, as the effects of key confounders were accounted for and the network was shown to be specific to anxiety. Moreover, spatial bias was limited by the inclusion of spatially heterogeneous lesion sites and brain stimulation sites spanning multiple targets. Inconsistency: It was not downgraded for inconsistency due to significant spatial correlations between the lesion, DBS, and TMS networks that comprise it. Indirectness: It was downgraded for indirectness as it was generated from lesion and brain stimulation patients with anxiety symptoms but not necessarily anxiety disorders. However, it should be noted that TMS site connectivity to the anxiety network predicted clinically meaningful changes in anxiety symptoms specifically in depressed patients with anxiety disorders. Imprecision: It was not downgraded for imprecision, as it was derived from several large sample datasets that generally used high resolution techniques to localize lesions/brain stimulation sites. Large effect magnitude: Clinical effect sizes were relatively small, so the network was not upgraded for effect size. Effect suppression: It was upgraded for suppression, as the measured effect size was likely an underestimate due to the integration of multiple causal data-sources with unique confounders. Dose effect: It was upgraded for dose-effect, as greater connectivity to the network predicted greater clinical improvement with therapeutic brain stimulation. Overall grade: The evidence supporting the anxiety network was evaluated as high quality.

*OCD*

Bias: The OCD network target was downgraded for bias because: (1) it was not shown to be specific to OCD versus other disorders/symptoms, and (2) it was derived from DBS sites that were restricted to two small target areas which may have biased results to specific networks. Inconsistency: It was not downgraded for inconsistency due to significant spatial correlations between OCD networks generated from different DBS datasets. Indirectness: The OCD network was generated by brain stimulation data and was therefore not downgraded for indirectness. Imprecision: It was not downgraded for imprecision, as it was derived from a relatively large sample of DBS sites localized using high resolution techniques. Large effect magnitude: Clinical effect sizes were medium, so the network was not upgraded for effect size. Effect suppression: It was not upgraded for suppression, as it was generated using one causal modality. Dose effect: It was upgraded for dose-effect, as greater DBS site connectivity to the network predicted greater clinical improvement. Overall grade: The evidence supporting the OCD network was evaluated as high quality.

*Addiction*

Bias: The addiction network target was not downgraded for bias, as the effects of key confounders were accounted for and the network was shown to be specific to remission of addiction symptoms. Moreover, spatial bias was limited by the inclusion of spatially heterogeneous lesion sites. Inconsistency: It was not downgraded for inconsistency due to significant spatial correlations between addiction networks generated from different lesion datasets. Indirectness: It was downgraded for indirectness because it was generated using lesions and not brain stimulation data. Imprecision: It was not downgraded for imprecision, as it was derived from large sample datasets that generally used high resolution techniques to localize lesions. Large effect magnitude: Clinical effect sizes were not reported, so the network was not upgraded for effect size. Effect suppression: It was not upgraded for suppression, as it was generated using one causal modality. Dose effect: It was upgraded for dose-effect, as the electric-field peaks of multiple TMS coils with established efficacy for addiction were shown to overlap with frontopolar locations with strong connectivity to the addiction network. Overall grade: The evidence supporting the addiction network was evaluated as high quality.

*PTSD*

Bias: The PTSD network target was not downgraded for bias, as the effects of key confounders were accounted for and the network was shown to be specific to protection against PTSD symptoms. Moreover, spatial bias was limited by the inclusion of spatially heterogeneous lesion sites. Inconsistency: It was not downgraded for inconsistency as a significant split-half spatial correlation was demonstrated. Indirectness: It was downgraded for indirectness because it was generated using lesions and not brain stimulation data. Imprecision: It was not downgraded for imprecision, as it was derived from a large sample dataset that used high resolution techniques to localize lesion sites. Large effect magnitude: Clinical effect sizes were not reported, so the network was not upgraded for effect size. Effect suppression: It was not upgraded for suppression, as it was generated using one causal modality. Dose effect: It was upgraded for dose-effect, as greater TMS induced connectivity changes within the network predicted greater PTSD symptom reduction. Overall grade: The evidence supporting the PTSD network was evaluated as high quality.

*Pain*

Bias: The pain network target was not downgraded for bias, as the effects of key confounders were accounted for and the network was shown to be specific to pain. Moreover, spatial bias was limited by the inclusion of spatially heterogeneous lesion sites. Inconsistency: It was not downgraded for inconsistency due to significant spatial correlations with a network generated from an independent sample of pain causing lesions. Indirectness: It was downgraded for indirectness because it was generated using lesions and not brain stimulation data. Imprecision: It was downgraded for imprecision, as it was derived from a relatively small number of pain causing lesions localized using 2d case report images. However, it should be noted that pain causing lesions from the cross-validation dataset were localized using original CT scans. Large effect magnitude: Clinical effect sizes were not reported, so the network was not upgraded for effect size. Effect suppression: It was not upgraded for suppression, as it was generated using one causal modality. Dose effect: The network was upgraded for dose effect, as TMS targets that intersected the network were shown to yield stronger effects on pain and individualized TMS electric field strength within the pain network was shown to predict pain response. Overall grade: The evidence supporting the pain network was evaluated as moderate quality.

*Psychosis*

Bias: The psychosis network target was not downgraded for bias, as the effects of key confounders were accounted for and the network was shown to be specific to psychosis. Moreover, spatial bias was limited by the inclusion of spatially heterogeneous lesion sites. Inconsistency: It was not downgraded for inconsistency as lesion connectivity to the network predicted psychosis symptoms in an out-of-sample dataset. Indirectness: It was downgraded for indirectness because it was generated using lesions and not brain stimulation data. Imprecision: Although it was generated using 2d case report images, it was not downgraded for imprecision because it was derived from a large sample, and the large dataset used to validate it employed high resolution techniques. Large effect magnitude: Clinical effect sizes were not reported, so the network was not upgraded for effect size. Effect suppression: It was not upgraded for suppression, as it was generated using one causal modality. Dose effect: Dose effect relevant results were not reported, so the network was not upgraded for dose effect. Overall grade: The evidence supporting the psychosis network was evaluated as high quality.

*Aggression*

Bias: The aggression network target was not downgraded for bias, as the effects of key confounders were accounted for and the network was shown to be specific to aggression-related constructs (i.e., criminality). Moreover, spatial bias was limited by the inclusion of spatially heterogeneous lesion sites. Inconsistency: It was not downgraded for inconsistency as lesions causing criminality in an independent dataset were shown to significantly intersect the aggression network. Indirectness: It was downgraded for indirectness because it was generated using lesions and not brain stimulation data. Imprecision: It was not downgraded for imprecision, as it was derived from a large sample dataset using high resolution techniques to localize lesion sites. Large effect magnitude: The reported clinical effects were indirect (i.e., DBS site connectivity to the aggression circuit predicted DBS effects on irritability), so the network was not upgraded for effect size. Effect suppression: It was not upgraded for suppression, as it was generated using one causal modality. Dose effect: It was not upgraded for dose-effect for the same reason that it was not upgraded for large effect magnitude. Overall grade: The evidence supporting the aggression network was evaluated as moderate quality.

*Emotional Regulation*

Bias: The emotional regulation network target was not downgraded for bias, as the effects of key confounders were accounted for and the ventral portion of the network was specifically linked to emotional regulation. Moreover, spatial bias was limited by the inclusion of spatially heterogeneous lesion sites. Inconsistency: It was not downgraded for inconsistency as an independent sample of lesions causing emotional regulation related dysfunction (i.e., mania, criminality, depression) were shown to significantly intersect it. Indirectness: It was downgraded for indirectness because it was generated using lesions and not brain stimulation data. Imprecision: It was not downgraded for imprecision, as it was derived from a large dataset using high resolution techniques to localize lesion sites. Large effect magnitude: Clinical effect sizes were not reported, so the network was not upgraded for effect size. Effect suppression: It was not upgraded for suppression, as it was generated using one causal modality. Dose effect: Dose effect relevant results were not reported, so the network was not upgraded for dose effect. Overall grade: The evidence supporting the emotional regulation network was evaluated as moderate quality.

*Mania*

Bias: The mania network target was not downgraded for bias, as the effects of key confounders were accounted for and the network was shown to be specific to mania. Moreover, spatial bias was limited by the inclusion of spatially heterogeneous lesion sites. Inconsistency: It was not downgraded for inconsistency because mania causing lesions from an independent dataset overlapped with the network significantly more than control lesions. Indirectness: It was downgraded for indirectness because it was generated using lesions and not brain stimulation data. Imprecision: It was downgraded for imprecision, as the majority of the lesions used to derive and validate (41/56) it were localized using 2d case report images. Moreover, the network was generated/validated from a relatively small number of mania causing lesions. Large effect magnitude: Clinical effect sizes were not reported, so the network was not upgraded for effect size. Effect suppression: It was not upgraded for suppression, as it was generated using one causal modality. Dose effect: TMS and DBS data provide preliminary evidence for a dose effect. However, these data had noteworthy limitations (i.e., broad, group average targets; small sample) and were therefore deemed not strong enough to justify a dose effect upgrade. Overall grade: The evidence supporting the mania network was evaluated as low quality.

*Transdiagnostic*

Bias: The transdiagnostic network target was downgraded for bias as it was not shown to be specific to psychiatric versus other symptoms. Inconsistency: It was downgraded for inconsistency because it was not subject to within or out-of-sample cross-validation. Indirectness: It was downgraded for indirectness because it was generated using lesions and not brain stimulation data. Imprecision: It was not downgraded for imprecision, as it was derived from a large sample dataset that used high resolution techniques to localize lesion sites. Large effect magnitude: Clinical effect sizes were not reported, so the network was not upgraded for effect size. Effect suppression: It was not upgraded for suppression, as it was generated using one causal modality. Dose effect: Dose effect relevant results were not reported, so the network was not upgraded for dose effect. Overall grade: The evidence supporting the transdiagnostic network was evaluated as very low quality.

*Criminality*

Bias: The criminality network target was not downgraded for bias, as the effects of key confounders were accounted for. Moreover, spatial bias was limited by the inclusion of spatially heterogeneous lesion sites. Inconsistency: It appeared to share a highly similar spatial topography with an out-of-sample lesion criminality network. However, statistically comparisons were not performed. Therefore, it was downgraded for inconsistency. Indirectness: It was downgraded for indirectness because it was generated using lesions and not brain stimulation data. Imprecision: It was downgraded for imprecision, as the lesions used to derive and validate it were localized using 2d case report images. Moreover, it was generated by a small number of lesions (N = 17). Large effect magnitude: Clinical effect sizes were not reported, so the network was not upgraded for effect size. Effect suppression: It was not upgraded for suppression, as it was generated using one causal modality. Dose effect: Dose effect relevant results were not reported, so the network was not upgraded for dose effect. Overall grade: The evidence supporting the criminality network was evaluated as very low quality.

Records identified through Embase
(n = 66)

Records identified through PubMed
(n = 1390)

Records identified through Web of Science
(n = 1747)

## Identification

Records after duplicates removed
(n = 2247)

## Screening

Records excluded
(n = 2175)

No causal network mapping (n = 2164)

Conference abstract (n = 11)

Records screened
(n = 2247)

Articles excluded
(n =61)

Structural imaging (n=12)

Non-psychiatric sample (n = 30)

Non-unique disorder/symptom (n = 13)

Case-report (n = 6)

## Eligibility

Articles assessed for eligibility
(n = 72)

Studies included in

meta-analysis
(n = 12)

(including one additional study identified by authors)

## Included

**Supplementary Fig. 1| PRISMA Diagram**

Flowchart depicting preferred reporting items for systematic reviews and meta-analyses (PRISMA) guided study selection process. For information on PRISMA, see: http://www.prismastatement.org/.
